# 1 Characterization of highly active mutational signatures in tumors from a large Chinese population

2  
3 Aaron Chevalier<sup>1,2\*</sup>, Tao Guo<sup>1,3\*</sup>, Natasha Q. Gurevich<sup>1,2\*</sup>, Jingwen Xu<sup>1,3</sup>,  
4 Masanao Yajima<sup>3</sup>, Joshua D. Campbell<sup>1,2</sup>  
5

- 6 1. Section of Computational Biomedicine, Department of Medicine, Boston University School of Medicine,  
7 Boston, Massachusetts.  
8 2. Bioinformatics Program, Boston University, Boston, Massachusetts.  
9 3. Department of Mathematics & Statistics, Boston University, Boston, Massachusetts.

10 \* These authors contributed equally to this work.  
11

## 12 Corresponding author:

13 Joshua D. Campbell

14 Email: [camp@bu.edu](mailto:camp@bu.edu)

15 72 E Concord St

16 Boston, MA 02118  
17  
18  
19

## 20 Abstract

21 The majority of mutational signatures have been characterized in tumors from Western countries and the degree  
22 to which mutational signatures are similar or different in Eastern populations has not been fully explored. We  
23 leveraged a large-scale clinical sequencing cohort of tumors from a Chinese population containing 25 tumor  
24 types and found that the highly active mutational signatures were similar to those previously characterized<sup>1,2</sup>.  
25 The aristolochic acid signature SBS22 was observed in four soft tissue sarcomas and the POLE-associated  
26 signature SBS10 was observed in a gallbladder carcinoma. In lung adenocarcinoma, the polycyclic aromatic  
27 hydrocarbon (PAH) signature SBS4 was significantly higher in males compared to females but not associated  
28 with smoking status. The UV-associated signature SBS7 was significantly lower in cutaneous melanomas from  
29 the Chinese population compared to a similar American cohort. Overall, these results add to our understanding  
30 of the mutational processes that contribute to tumors from the Chinese population.  
31  
32  
33  
34  
35  
36  
37

## 38 Main

39 A variety of exogenous exposures or endogenous biological processes can contribute to the overall mutational  
40 load observed in human tumors<sup>1,3,4</sup>. Many different mutational patterns, or “mutational signatures”, have been  
41 identified across different tumor types<sup>3,5-9</sup> which can provide a record of environmental exposure or clues about  
42 the etiology of carcinogenesis<sup>10</sup>. The majority of mutational signature characterization has been performed using  
43 tumors from Western populations due to the availability of sequencing data in these regions from large-scale  
44 atlases such as The Cancer Genome Atlas (TCGA)<sup>11</sup> and the International Cancer Genome Consortium  
45 (ICGC)<sup>12</sup>. While cancer incidence and mortality can vary across regions and countries<sup>13</sup>, the degree to which  
46 mutational signatures are similar or different between populations remains an open area of exploration.  
47 Exposures to certain carcinogens and their corresponding mutational signatures have been characterized in  
48 Eastern populations. For example, aristolochic acid is found in herbal medicines used in Asian populations and  
49 can cause the single-base substitution (SBS) signature SBS22 in hepatocellular carcinomas (HCCs)<sup>14</sup>. Similarly,  
50 exposure to aflatoxin B1 produced by molds growing on food can cause SBS24 in HCCs<sup>15</sup>.

51  
52 Previously, a large-scale cohort of tumors from the Chinese population was profiled with a targeted DNA  
53 sequencing panel developed by Origimed (OM cohort)<sup>16</sup>. This work compared the frequency of driver genes,  
54 tumor mutational burden (TMB), gene fusions, and clinically actionable alterations between tumors from Chinese  
55 and American populations. We further leveraged this cohort to characterize the landscape of highly active  
56 mutational signatures across a large spectrum of tumor types in the Chinese population. 2,115 tumors with at  
57 least 10 mutations from 25 tumor types were utilized for mutational signature analysis. We first performed *de*  
58 *nov*o deconvolution with Non-Negative Matrix Factorization (NMF) using the SigProfiler package<sup>17</sup> and identified  
59 six mutational signatures (**Supplementary Figure 1, Supplementary Table 1, Supplementary Table 2**). All  
60 signatures were highly correlated with previously defined signatures in the COSMIC database, indicating that no  
61 new highly active mutational processes were present in this cohort. The discovered signatures included those  
62 correlated with SBS1/6, SBS4, SBS10, SBS12/26, SBS2/13, and SBS22.

63  
64 The limited number of mutations in the targeted sequencing data can hinder *de novo* mutational signature  
65 discovery. Therefore, we also predicted signature activity levels for existing COSMIC signatures using the  
66 musicatk package<sup>18</sup> (**Supplementary Table 3**). The landscape of activities for 16 signatures across tumor types  
67 is shown in **Figure 1 (Supplementary Table 4)**. Signatures related to endogenous biological processes included  
68 the aging-related signature SBS1 and the clock-like signature SBS5 which were broadly detected across tumor  
69 types. The APOBEC-related signatures SBS2 and SBS13 were often observed together across a variety of  
70 epithelial tumor types such as breast carcinoma, carcinoma of the uterine cervix, esophageal carcinoma, gall  
71 bladder carcinoma, non-small cell lung cancer (NSCLC), and urothelial carcinoma. Several signatures related to  
72 defective mismatch repair (MMR), microsatellite instability (MSI), or defective DNA polymerase activity were  
73 detected, including SBS6, SBS15, SBS20, SBS21, SBS26, SBS17, and SBS10. As previously observed in  
74 Western cohorts, these signatures often co-occurred in the same samples<sup>1,2</sup>. One or more of these signatures  
75 were active in samples from many of the same tumor types observed in Western cohorts including bone  
76 sarcoma<sup>1</sup>, colorectal carcinoma<sup>1</sup>, intrahepatic and extrahepatic cholangiocarcinoma<sup>1</sup>, gall bladder carcinoma<sup>19</sup>,  
77 gastric cancer<sup>20</sup>, head and neck carcinoma<sup>1</sup>, kidney/renal cell carcinoma<sup>1</sup>, ovarian carcinoma<sup>1</sup>, pancreatic  
78 cancer<sup>1</sup>, small bowel carcinoma<sup>21</sup>, soft tissue sarcoma<sup>22</sup>, and uterine corpus endometrial carcinoma<sup>1</sup>. We also  
79 observed three gallbladder carcinomas with high levels of SBS6 as well as one sample with SBS10 (POLE),  
80 which has not been previously observed for this cancer type<sup>23,24</sup>. High levels of SBS17 were found in a small  
81 number of tumors from breast carcinoma, colorectal carcinoma, extrahepatic cholangiocarcinoma, gastric  
82 cancer, or liver/hepatocellular carcinoma. While this signature often co-occurred with other signatures, some  
83 tumors contained only this signature. High levels of SBS10 related to defects in POLE were observed in 22  
84 colorectal carcinomas and 3 uterine corpus endometrial carcinomas.

85

86 Several detected signatures are known to be caused by exposure to exogenous DNA damaging agents. SBS4  
87 is caused by exposure to polycyclic aromatic hydrocarbons (PAHs) such as benzo[a]pyrene in cigarette smoke<sup>25</sup>  
88 and was observed in small cell lung cancers (SCLCs) and NSCLCs. SBS22 is caused by exposure to aristolochic  
89 acid and was detected in liver/hepatocellular carcinomas, intra and extrahepatic cholangiocarcinomas,  
90 kidney/renal cell carcinomas, and urothelial carcinomas (**Figure 2A**). Interestingly, SBS22 was also detected in  
91 four soft tissue sarcomas and one esophageal carcinoma, which has not been previously reported<sup>22,26</sup> (**Figure**  
92 **2B**). SBS24 reflecting aflatoxin B1 exposure was detected at high or moderate levels in 2 liver/hepatocellular  
93 carcinomas similar to previous reports<sup>1,27</sup>. This signature was also highly detected in 1 colorectal carcinoma and  
94 1 gastric cancer raising the possibility that this exposure or something similar can induce mutations in more  
95 tumor types than previously appreciated. SBS7 is caused by UV radiation exposure and was highly detected in  
96 2 melanomas, 1 head & neck carcinoma, and 2 urothelial carcinomas. Lastly, SBS18 which is potentially due to  
97 oxidative stress was detected in 1 colorectal carcinoma.

98

99 We next sought to directly compare the signature activity levels in this Chinese population to a similar clinical  
100 cohort of tumors from an American population. Specifically, we leveraged a dataset generated at Memorial Sloan  
101 Kettering (MSK) that was profiled with the IMPACT targeted sequencing panel. After mapping major tumor types  
102 and tumor subtypes between cohorts, 13 groups with at least 5 samples in each cohort were compared  
103 (**Supplementary Table 5**). For each signature, we first compared the proportion of samples with high activity of  
104 that signature between cohorts using a Fisher's exact test. The only significant difference was that the American  
105 cohort had a higher proportion of tumors with the UV signature SBS7 in soft tissue sarcoma compared to the  
106 Chinese cohort (FDR < 0.05; **Figure 3A**; **Supplementary Table 6**). The MSK cohort did not have any tumors  
107 with high SBS22 reflecting that aristolochic acid exposure is largely occurs in Eastern population. Next, we  
108 compared the median activity of the proposal signature activities across cohorts. The majority of the proportional  
109 signature activities were not significantly different between cohorts after applying an FDR correction (**Figure 3B**;  
110 **Supplementary Table 7**). The only exceptions were that SBS2 in breast carcinoma, SBS6 in colorectal  
111 carcinoma, and SBS5 in hepatocellular carcinoma had significantly lower levels in the OM cohort compared to  
112 the MSK cohort (Wilcoxon rank-sum test; FDR < 0.05). These results demonstrate that the major differences  
113 between populations are due to exposure to specific mutagens and that the levels of other common signatures  
114 are largely the same in tumors across Chinese and American populations despite the underlying heterogeneity  
115 in clinical and regional characteristics.

116

117 SBS4 was highly prevalent across NSCLCs including lung adenocarcinomas (LUADs) and lung squamous cell  
118 carcinomas (LUSCs) as well as in small cell lung cancer (SCLCs) as previously observed<sup>1,25,28,29</sup> (**Figure 1**,  
119 **Figure 4A**). In China, rates of cigarette smoking are much higher among males compared to females<sup>30</sup>. We  
120 observed similar trends in this cohort with a higher proportion of male in the smokers compared to the non-  
121 smokers ( $p < 2.2e-16$ ; Fisher's exact test; **Figure 4B**). Furthermore, LUADs from female non-smokers in Asian  
122 populations tend to be driven by alterations in *EGFR*<sup>31</sup>. Similarly, in this cohort we observed a higher proportion  
123 of tumors with *EGFR* mutations in females compared to males in both the smokers ( $p = 0.0061$ ) as well as the  
124 non-smokers ( $p = 0.0004$ ; **Figure 4B**). In Western cohorts, SBS4 activity is strongly associated with smoking  
125 status in LUAD<sup>32</sup>. Surprisingly in this Chinese cohort, the SBS4 signature was not associated with smoking status  
126 but instead was strongly associated with sex (**Figure 4C**). Specifically, the level of SBS4 activity was significantly  
127 higher in males compared to females within smokers ( $p = 0.00398$ ) and even more so within non-smokers ( $p =$   
128  $4.37e-07$ ). SBS4 was not significantly different between smokers and non-smokers in males or between smokers  
129 and non-smokers in females ( $p > 0.05$ ) indicating that the association with sex is not just due to the differences  
130 in the prevalence of smoking between men and women. When applying a multivariate linear model to a subset  
131 of LUADs with complete clinical information ( $n=271$ ), SBS4 activity was significantly higher in males compared

132 to females ( $p = 1.48e-07$ ), decreasing with age ( $p = 0.0013$ ), lower in tumors with *EGFR* mutations ( $p =$   
133  $0.0072$ ), and lower in metastatic versus primary samples ( $p = 0.0004$ ). SBS4 activity was not significantly  
134 associated with tumor purity, stage, or smoking status ( $p > 0.01$ ; **Figure 4D**). No associations were found  
135 between SBS4 activity and these variables in LUSC or SCLC ( $p > 0.01$ ; **Supplementary Figure 2**) demonstrating  
136 that this phenomenon is specific to LUAD. While inaccurate self-reported smoking status may be a factor, these  
137 findings may suggest that factors other than smoking status are contributing to SBS4 mutations in males from  
138 China. Other possible factors affecting SBS4 mutations in males may include a higher daily usage of cigarettes  
139 or a higher exposure to air pollution and ambient particulate matter compared to women<sup>33,34</sup>. Additional cohorts  
140 of LUADs with detailed smoking and exposure history will likely be needed to further understand the causes of  
141 this association.

142  
143 In the OM cohort, only 7 of 54 melanomas had greater than 10 mutations (13%) which is significantly less than  
144 the MSK cohort in which 145 of 358 (41%) of the melanomas had greater than 10 mutations ( $p = 6.0e-05$ ; Fisher's  
145 exact test). SBS7 was only highly detected in 2 of the 7 melanomas in the OM cohort (**Figure 5A**). Asian  
146 populations have higher rates of acral and mucosal melanomas whereas Western populations have higher rates  
147 of cutaneous melanoma<sup>35,36</sup>. Acral and mucosal subtypes often have lower mutation rates and are less driven  
148 by UV-induced DNA damage compared to cutaneous melanomas<sup>37</sup>. To understand differences between  
149 populations specifically in cutaneous melanoma, we expanded the analysis to examine the mutational profiles  
150 of all cutaneous melanomas across both cohorts (including tumors with less than 10 mutations which were  
151 excluded in the mutational signature analysis). Cutaneous melanomas from the OM cohort ( $n=26$ ) had  
152 significantly lower SBS mutations per megabase (Mb) than cutaneous melanomas from the MSK cohort ( $n =$   
153  $191$ ;  $p = 1.5e-13$ ; **Figure 5B**). They also had lower frequencies of any C>T mutations ( $p = 1.1e-7$ ; **Figure 5C**)  
154 and C>T mutations at the TCA, CCC, and TCT trinucleotide contexts, which are the most common contexts in  
155 the UV-associated signature SBS7 ( $p = 1.1e-5$ ; **Figure 5D**). These findings corroborate the recent work showing  
156 that the number of UV-associated mutations in normal skin is lower in Asian populations compared to Western  
157 populations despite Asian populations having higher levels of exposure to UV radiation<sup>38</sup>. Additionally, lower  
158 response rates to immune checkpoint inhibitors have been observed in melanomas from the Chinese population  
159 compared to Western populations<sup>39</sup> which could be a result of the lower tumor mutation burden (TMB)<sup>40</sup>. Our  
160 data suggests that the lower prevalence of UV-associated mutations is a major contributor to the lower overall  
161 TMB in Chinese cutaneous melanomas.

162  
163 Overall, this analysis provides an overview into the mutational signatures that are highly active in a large Chinese  
164 population. One limitation of this study is that the OM cohort was profiled with a targeted sequencing panel which  
165 has a lower number of mutations detected per tumor. Having lower counts can hinder detection of signatures  
166 that tend to have lower activity levels. For example, we were not able to confidently detect signature SBS3 which  
167 denotes homologous repair deficiency (HRD) caused by loss of *BRCA1/2*. SBS3 has been previously  
168 characterized in breast cancers from Chinese and Korean populations<sup>41,42</sup>. Despite this limitation, we were able  
169 to detect signatures that are highly active in these tumors (i.e. signatures that produce enough mutations to be  
170 detected with a limited targeted sequencing panel) and characterize novel associations specific to this Chinese  
171 population.

172  
173  
174

## Online Methods

**Cohort.** The full details of the patient consent, clinical characteristics, biospecimen processing, and DNA sequencing have been previously described<sup>16</sup>. Briefly, tumors from 25 tumor types were profiled with a DNA sequencing panel targeting 450 genes, *TERT* promoter mutations, and 39 introns in a Clinical Laboratory Improvement Amendments (CLIA)-certified and College of American Pathologists (CAP)-accredited laboratory by the Chinese-based company Origimed. The mutations and clinical data were retrieved from the cBioPortal ([https://www.cbioportal.org/study/summary?id=pan\\_origimed\\_2020](https://www.cbioportal.org/study/summary?id=pan_origimed_2020)). Each tumor has a major cancer type and a more specific detailed cancer type. For most tumors, we used the major cancer type label. Given the high numbers of Non-Small Cell Lung Cancers (NSCLCs) in this dataset, we divided this group into Lung Adenocarcinomas (LUADs), Lung Squamous Cell Carcinomas (LUSCs), and “NSCLC - Other” which contained the subcategories of “Lung Adenosquamous Carcinoma”, “Large Cell Lung Carcinoma”, and “Non-Small Cell Lung Cancer Other”.

**Signature discovery and prediction.** Single base substitutions (SBSs) were extracted in each tumor to produce a count table using the musicatk R package v1.91<sup>18</sup>. Mutational signature discovery and prediction was limited to 2,115 tumors from 25 major tumor types that had at least 10 single base substitutions. Mutational signatures were first discovered *de novo* using NMF from the SigProfiler package v1.1.4<sup>17</sup> setting the reference genome to GRCh38. The number of signatures predicted was varied from one to eight and the optimal number of six was chosen based on the maximal difference between the mean sample cosine distance and average stability metrics. Discovered signatures were compared to those from the COSMIC V2 database using cosine similarity. Next, the activity of all COSMIC V2 signatures were predicted using the “auto\_predict\_grid” function in the musicatk package with the “algorithm” parameter set to “lda\_posterior” and the “sample\_annotation” parameter set to the tumor type<sup>18</sup>. Initially, 25 signatures were detected with this method. We manually reviewed each signature according to criteria set in the PanCancer Analysis of Whole-Genomes (PCAWG) mutational signature working group<sup>2</sup>. Specifically, we examined the mutation counts from individual tumors with high predicted activities of each signature. If no individual tumors displayed a mutational pattern that was predominantly correlated with the signature, then this signature was excluded from the final signature set. The final signature activities were predicted using the “predict\_exposure” function with the “algorithm” parameter set to “lda” and specifying sixteen SBS signatures that passed inspection including 1, 2, 4, 5, 6, 7, 10, 13, 15, 17, 18, 20, 21, 22, 24, and 26. A signature was considered highly active in an individual tumor if it contained at least 10 estimated counts in that tumor. Proportional signature activities were calculated by dividing each signature activity within a tumor by the total number of estimated signature activity counts from that tumor.

**Comparison to Western cohorts.** Mutations for the MSK cohort were downloaded from cBioPortal ([https://www.cbioportal.org/study/summary?id=msk\\_impact\\_2017](https://www.cbioportal.org/study/summary?id=msk_impact_2017)). SBSs were extracted from each tumor using the musicatk package and samples with at least 10 mutations were retained for the analysis. The same signatures that were detected in the OM cohort were predicted in the MSK cohort using the “predict\_exposure” function with the “algorithm” parameter set to “lda”. Tumor types were mapped between cohorts using either the major or more detailed cancer type label (**Supplementary Table 3**). The medial level of proportional activity for each signature in a tumor type was compared across cohorts using a Wilcoxon rank-sum test followed by correction for multiple hypothesis testing using the False Discovery Rate (FDR). The frequencies of tumors with detected signature activity were compared across cohorts using the Fisher’s exact test followed by and FDR correction. Only tumor types with at least 5 tumors in both cohorts were including in the analysis. For both comparisons, only signatures with a median level of 0.01 across all samples from both cohorts were included in the analysis.

222 **Determining association to other clinical or genomic variables.** The Wilcoxon rank-sum test was used to  
223 assess differences in normalized signature activities between two groups. The association between SBS4  
224 activity and covariates was also assessed using multivariate linear regression within each lung tumor type. SBS4  
225 activity was log transformed after adding a pseudocount of 1 and treated as the dependent variable. Independent  
226 variables included age at diagnosis, sex, smoking status, stage according to the American Joint Committee on  
227 Cancer (AJCC), tumor purity, *EGFR* mutation status, and sample type (primary or metastasis). Samples with  
228 “Unknown” status for any variable were excluded from the regression and any variable that did not have more  
229 than one category within a cancer type was excluded from the regression for that cancer type.

230  
231 **Code availability.** All code for the analysis is available on GitHub at [https://github.com/campbio-](https://github.com/campbio-manuscripts/Chinese_Mutsigs)  
232 [manuscripts/Chinese\\_Mutsigs](https://github.com/campbio-manuscripts/Chinese_Mutsigs).

## Acknowledgements

This work was funded by the National Cancer Institute (NCI) Informatics Technology for Cancer Research (ITCR) 1U01CA253500 (J.D. Campbell and M. Yajima). We thank Drs. Kai Wang and Xiaoliang Shi for helpful insights about the OrigiMed dataset.

## References

1. Alexandrov, L. B. *et al.* The repertoire of mutational signatures in human cancer. *Nature* **578**, 94–101 (2020).
2. ICGC/TCGA Pan-Cancer Analysis of Whole Genomes Consortium. Pan-cancer analysis of whole genomes. *Nature* **578**, 82–93 (2020).
3. Alexandrov, L. B. *et al.* Signatures of mutational processes in human cancer. *Nature* **500**, 415–21 (2013).
4. Lawrence, M. S. *et al.* Mutational heterogeneity in cancer and the search for new cancer-associated genes. *Nature* **499**, 214–218 (2013).
5. Alexandrov, L. B., Nik-Zainal, S., Siu, H. C., Leung, S. Y. & Stratton, M. R. A mutational signature in gastric cancer suggests therapeutic strategies. *Nat Commun* **6**, 8683 (2015).
6. Alexandrov, L. B., Nik-Zainal, S., Wedge, D. C., Campbell, P. J. & Stratton, M. R. Deciphering signatures of mutational processes operative in human cancer. *Cell Rep* **3**, 246–59 (2013).
7. Kim, J. *et al.* Somatic ERCC2 mutations are associated with a distinct genomic signature in urothelial tumors. *Nat Genet* **48**, 600–606 (2016).
8. Morganella, S. *et al.* The topography of mutational processes in breast cancer genomes. *Nat Commun* **7**, 11383 (2016).
9. Roberts, S. A. *et al.* An APOBEC cytidine deaminase mutagenesis pattern is widespread in human cancers. *Nat Genet* **45**, 970–976 (2013).
10. Nik-Zainal, S. *et al.* The genome as a record of environmental exposure. *Mutagenesis* **30**, 763–70 (2015).
11. Weinstein, J. N. *et al.* The Cancer Genome Atlas Pan-Cancer analysis project. *Nat Genet* **45**, 1113–1120 (2013).
12. Zhang, J. *et al.* The International Cancer Genome Consortium Data Portal. *Nat Biotechnol* **37**, 367–369 (2019).
13. Lin, L. *et al.* Global, regional, and national cancer incidence and death for 29 cancer groups in 2019 and trends analysis of the global cancer burden, 1990-2019. *J Hematol Oncol* **14**, 197 (2021).
14. Kaya, N. A. *et al.* Genome instability is associated with ethnic differences between Asians and Europeans in hepatocellular carcinoma. *Theranostics* **12**, 4703–4717 (2022).
15. Huang, M. N. *et al.* Genome-scale mutational signatures of aflatoxin in cells, mice, and human tumors. *Genome Res* **27**, 1475–1486 (2017).
16. Wu, L. *et al.* Landscape of somatic alterations in large-scale solid tumors from an Asian population. *Nat Commun* **13**, 4264 (2022).
17. Islam, S. M. A. *et al.* Uncovering novel mutational signatures by de novo extraction with SigProfilerExtractor. *Cell genomics* **2**, None (2022).
18. Chevalier, A. *et al.* The Mutational Signature Comprehensive Analysis Toolkit (musicatk) for the Discovery, Prediction, and Exploration of Mutational Signatures. *Cancer Res* **81**, 5813–5817 (2021).
19. Guo, L. *et al.* Genomic mutation characteristics and prognosis of biliary tract cancer. *Am J Transl Res* **14**, 4990–5002 (2022).
20. Pužar Dominkuš, P. & Hudler, P. Mutational Signatures in Gastric Cancer and Their Clinical Implications. *Cancers (Basel)* **15**, (2023).
21. Hänninen, U. A. *et al.* Exome-wide somatic mutation characterization of small bowel adenocarcinoma. *PLoS Genet* **14**, e1007200 (2018).

- 279 22. Cancer Genome Atlas Research Network. Electronic address: elizabeth.demicco@sinaihealthsystem.ca &  
280 Cancer Genome Atlas Research Network. Comprehensive and Integrated Genomic Characterization of  
281 Adult Soft Tissue Sarcomas. *Cell* **171**, 950-965.e28 (2017).
- 282 23. Nepal, C. *et al.* Integrative molecular characterisation of gallbladder cancer reveals micro-environment-  
283 associated subtypes. *J Hepatol* **74**, 1132–1144 (2021).
- 284 24. Kang, M. *et al.* Gallbladder adenocarcinomas undergo subclonal diversification and selection from  
285 precancerous lesions to metastatic tumors. *Elife* **11**, (2022).
- 286 25. Alexandrov, L. B. *et al.* Mutational signatures associated with tobacco smoking in human cancer. *Science*  
287 **354**, 618–622 (2016).
- 288 26. Lim, A. H. *et al.* Rare Occurrence of Aristolochic Acid Mutational Signatures in Oro-Gastrointestinal Tract  
289 Cancers. *Cancers (Basel)* **14**, (2022).
- 290 27. Damrauer, J. S. *et al.* Genomic characterization of rare molecular subclasses of hepatocellular carcinoma.  
291 *Commun Biol* **4**, 1150 (2021).
- 292 28. van den Heuvel, G. R. M. *et al.* Mutational signature analysis in non-small cell lung cancer patients with a  
293 high tumor mutational burden. *Respir Res* **22**, 302 (2021).
- 294 29. Wang, H. *et al.* Molecular subtyping of small-cell lung cancer based on mutational signatures with different  
295 genomic features and therapeutic strategies. *Cancer Sci* **114**, 665–679 (2023).
- 296 30. Zhang, M. *et al.* Trends in smoking prevalence in urban and rural China, 2007 to 2018: Findings from 5  
297 consecutive nationally representative cross-sectional surveys. *PLoS Med* **19**, e1004064 (2022).
- 298 31. Ha, S. Y. *et al.* Lung cancer in never-smoker Asian females is driven by oncogenic mutations, most often  
299 involving EGFR. *Oncotarget* **6**, 5465–74 (2015).
- 300 32. Campbell, J. D. *et al.* Distinct patterns of somatic genome alterations in lung adenocarcinomas and  
301 squamous cell carcinomas. *Nat Genet* **48**, 607–16 (2016).
- 302 33. Yin, P. *et al.* The effect of air pollution on deaths, disease burden, and life expectancy across China and  
303 its provinces, 1990-2017: an analysis for the Global Burden of Disease Study 2017. *Lancet Planet Health*  
304 **4**, e386–e398 (2020).
- 305 34. Liu, S. *et al.* Prevalence and patterns of tobacco smoking among Chinese adult men and women: findings  
306 of the 2010 national smoking survey. *J Epidemiol Community Health (1978)* **71**, 154–161 (2017).
- 307 35. Lv, J., Dai, B., Kong, Y., Shen, X. & Kong, J. Acral Melanoma in Chinese: A Clinicopathological and  
308 Prognostic Study of 142 cases. *Sci Rep* **6**, 31432 (2016).
- 309 36. Chang, J. W.-C. *et al.* Malignant melanoma in Taiwan: a prognostic study of 181 cases. *Melanoma Res*  
310 **14**, 537–41 (2004).
- 311 37. Rose, A. A. N. *et al.* Biologic subtypes of melanoma predict survival benefit of combination anti-PD1+anti-  
312 CTLA4 immune checkpoint inhibitors versus anti-PD1 monotherapy. *J Immunother Cancer* **9**, (2021).
- 313 38. King, C. *et al.* Somatic mutations in facial skin from countries of contrasting skin cancer risk. *Nat Genet*  
314 **55**, 1440–1447 (2023).
- 315 39. Si, L. *et al.* A Phase Ib Study of Pembrolizumab as Second-Line Therapy for Chinese Patients With  
316 Advanced or Metastatic Melanoma (KEYNOTE-151). *Transl Oncol* **12**, 828–835 (2019).
- 317 40. Huang, F. *et al.* Next-generation sequencing in advanced Chinese melanoma reveals therapeutic targets  
318 and prognostic biomarkers for immunotherapy. *Sci Rep* **12**, 9559 (2022).
- 319 41. Jiang, Y.-Z. *et al.* Genomic and Transcriptomic Landscape of Triple-Negative Breast Cancers: Subtypes  
320 and Treatment Strategies. *Cancer Cell* **35**, 428-440.e5 (2019).
- 321 42. Pan, J.-W. *et al.* The molecular landscape of Asian breast cancers reveals clinically relevant population-  
322 specific differences. *Nat Commun* **11**, 6433 (2020).
- 323  
324



Figures

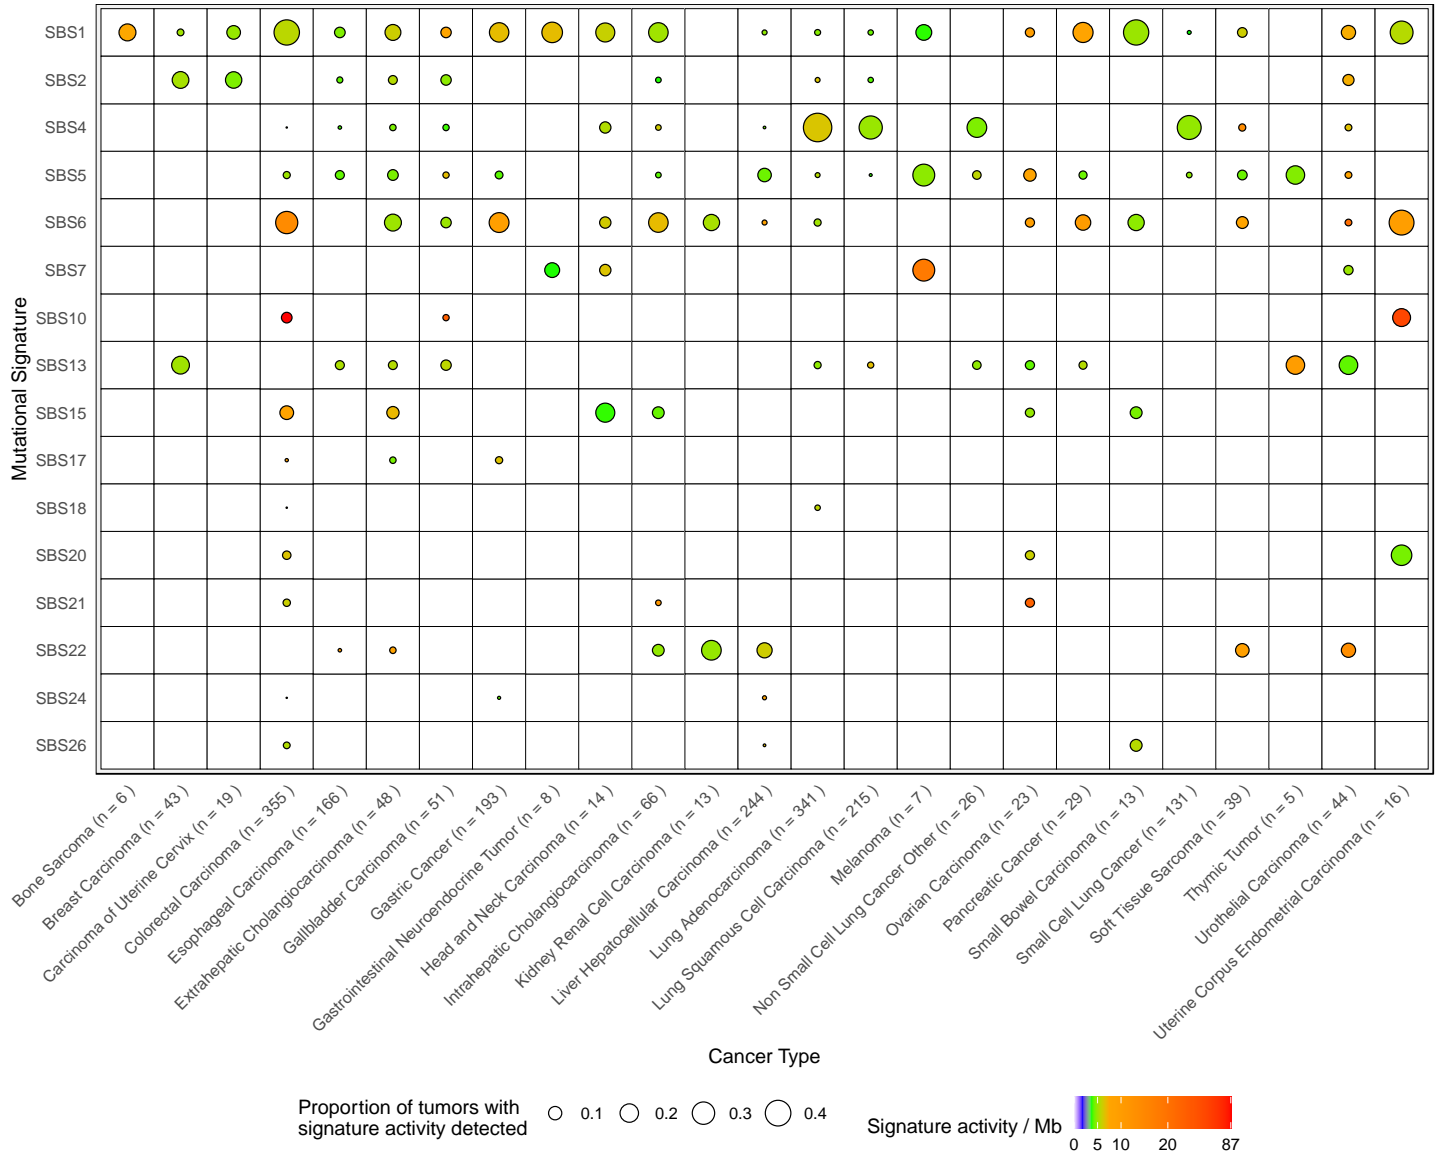

**Figure 1. The landscape of highly active mutational signatures in a large Chinese population.** Sixteen mutational signatures were identified across 2,115 tumors from 25 tumor types. The size of the dot corresponds to the percentage of tumors within each tumor type that have detectable levels of the signature. Signatures with at least 10 counts were considered detected in an individual tumor. The color of the dot corresponds to the median activity of each signature within the detected samples per megabase (Mb).

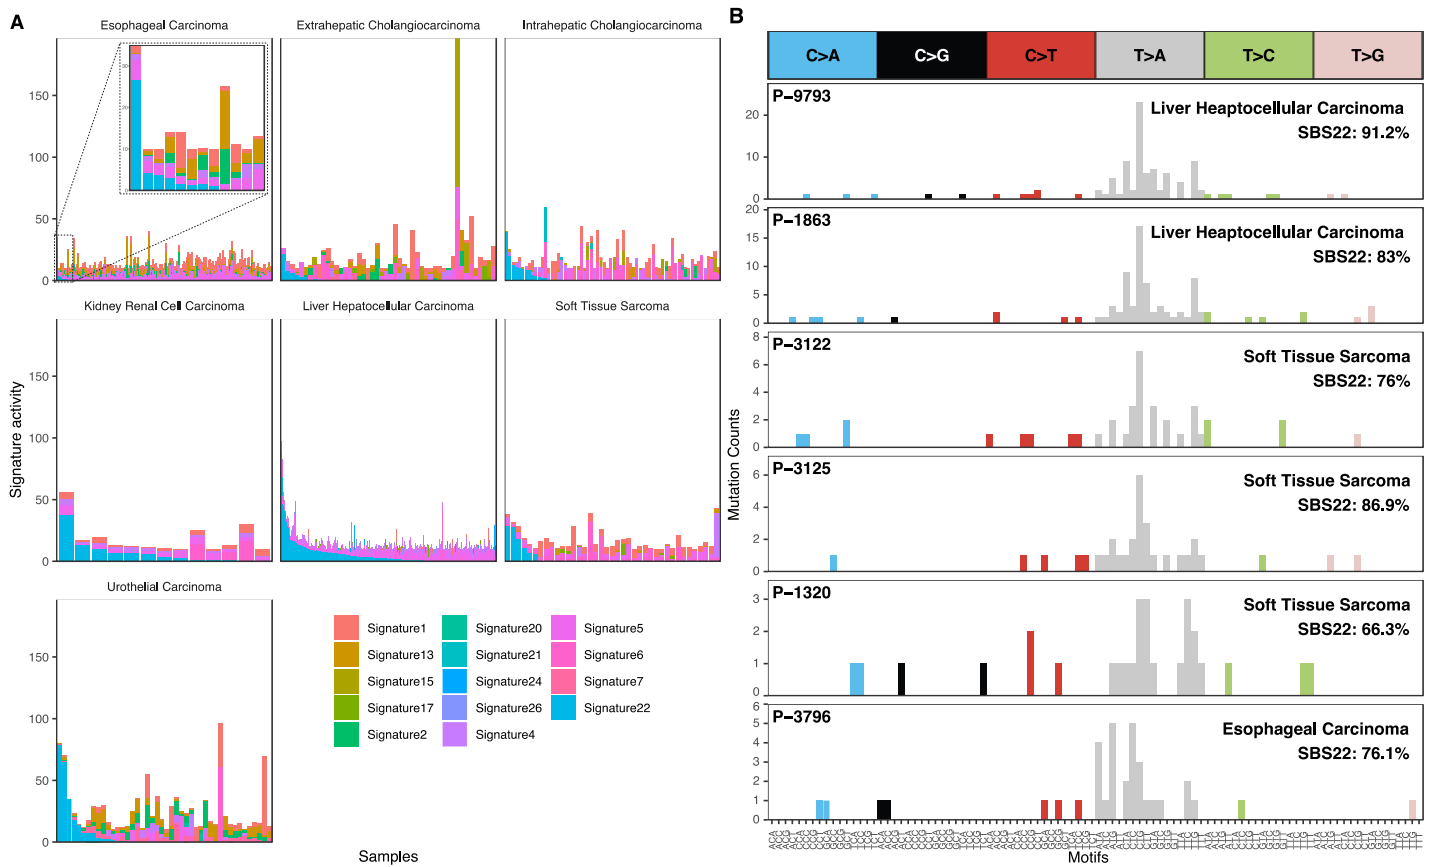

336  
 337  
 338  
 339  
 340  
 341  
 342  
 343  
 344  
 345  
 346

**Figure 2. Prevalence of aristolochic acid (SBS22) activity across tumor types. (A)** SBS22 reflects exposure to aristolochic acid and was highly active in 32 liver/hepatocellular carcinomas, 6 intra or extrahepatic cholangiocarcinomas, 3 kidney renal cell carcinomas, and 5 urothelial carcinomas. This signature was also detected in 4 soft tissue sarcomas and 1 esophageal carcinoma which has not been reported in Western cohorts. Each bar represents the level of the estimated signature activities in each sample and samples are ordered by the level of SBS22. **(B)** Mutation counts for 2 example liver/hepatocellular carcinomas, 3 soft tissue sarcomas, and 1 esophageal carcinoma that predominantly contain the SBS22 signature.

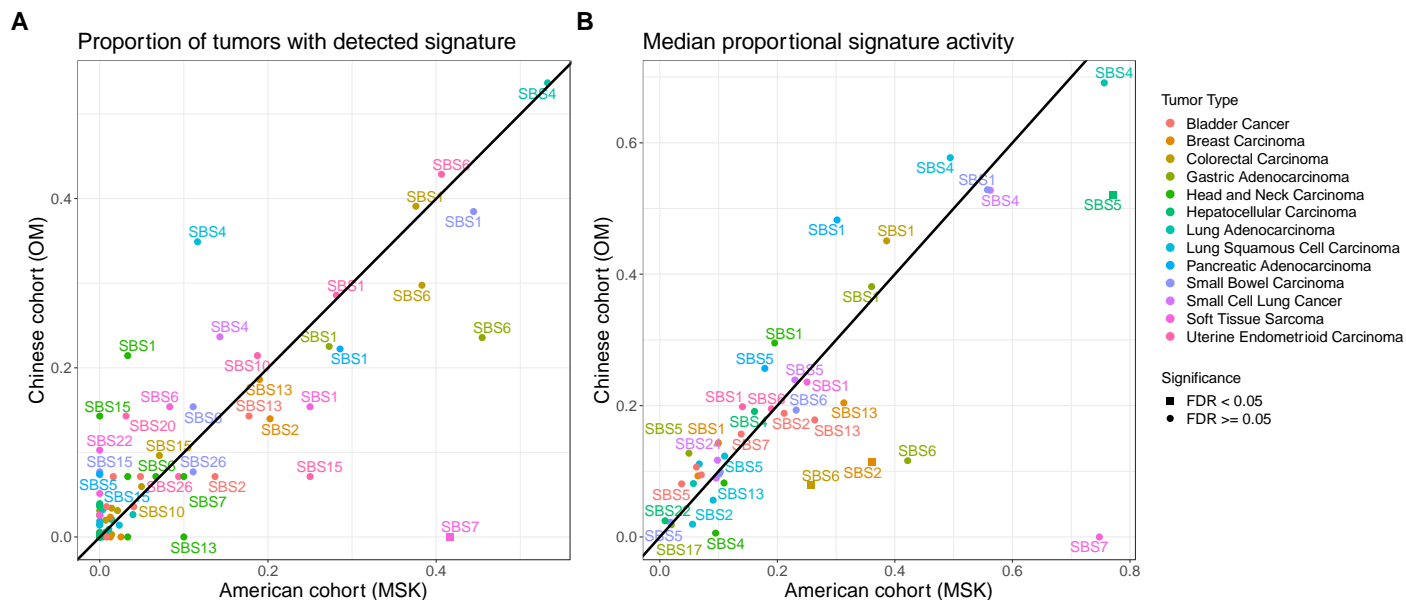

**Figure 3. Comparison of signature detection and activity levels across populations. (A)** Signatures with at least 10 counts in a tumor were considered detected in that tumor. The frequencies of detected signatures were compared across Chinese (OM) and American (MSK) cohort using the Fisher's exact test with an FDR correction. Only tumor types with at least 5 tumors in each cohort were included. The majority of signature detection rates were not significantly different between cohorts with the exception of the UV-associated signature SBS7 which was found in a higher proportion of soft tissue sarcomas in the MSK cohort compared to the OM cohort. **(B)** The median levels of proportional signature activities were compared for matched tumor types between the Chinese (OM) and American (MSK) cohorts using a Wilcoxon rank-sum test with an FDR correction. The majority of signature activities were not significantly different between cohorts with the exception of the APOBEC SBS2 signature in breast carcinoma, the SBS6 signature in colorectal carcinoma, and the SBS5 signature in hepatocellular carcinoma.

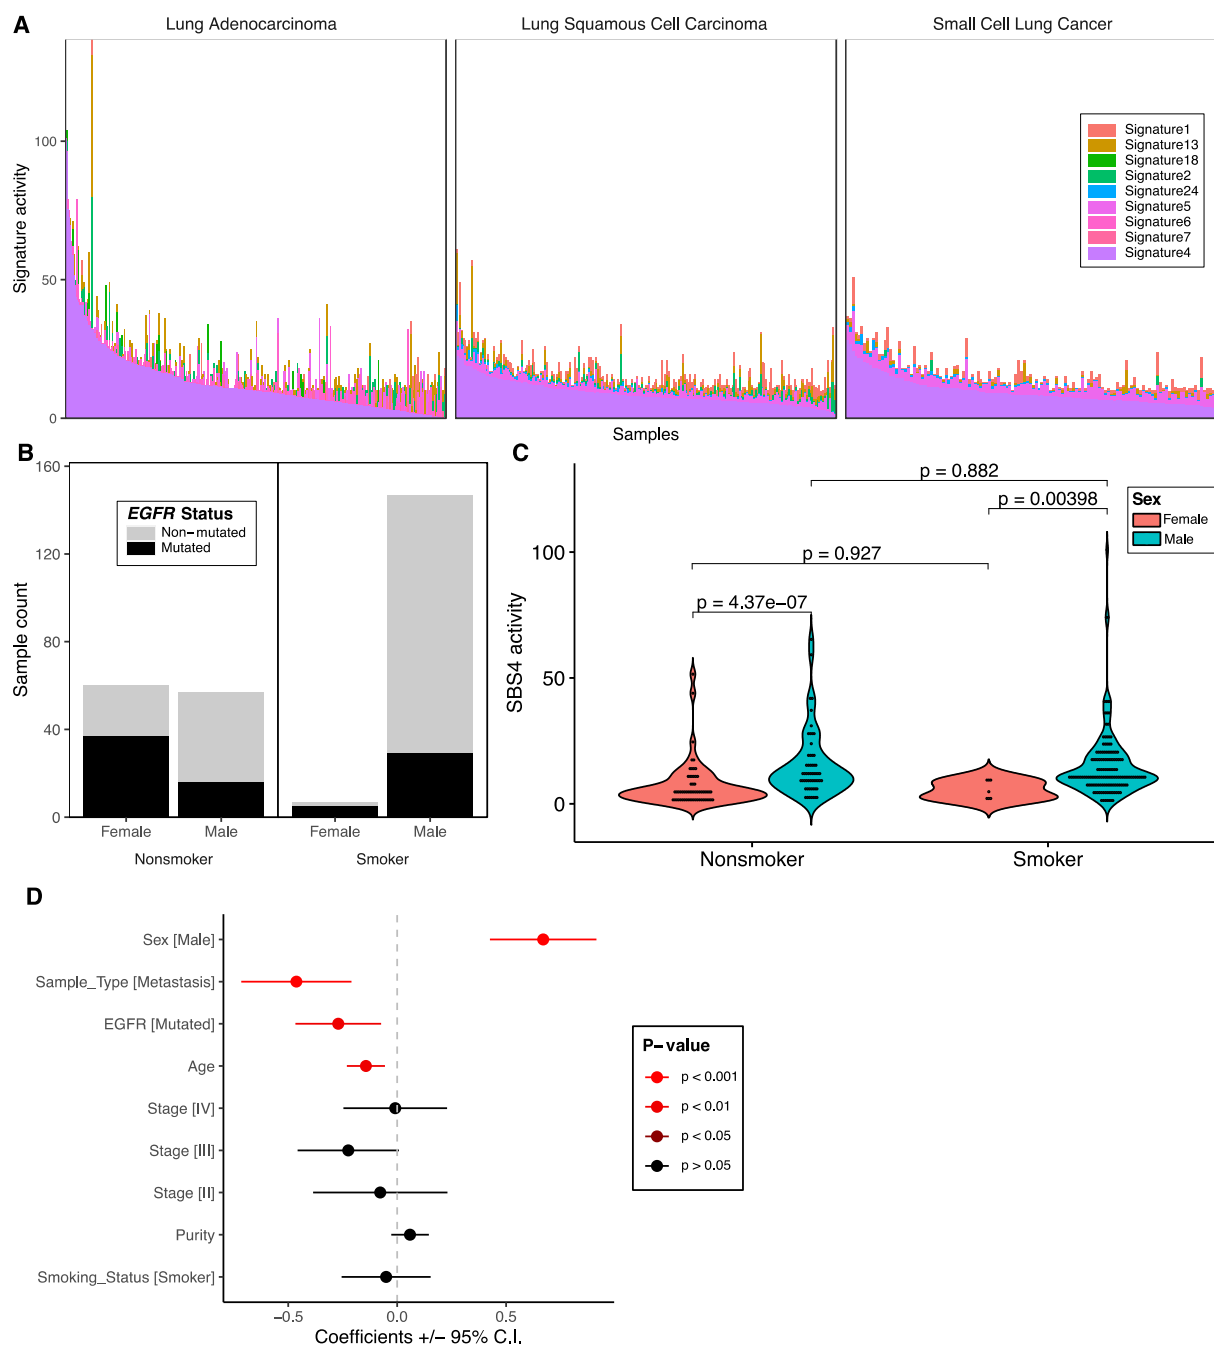

368  
369  
370  
371  
372  
373  
374  
375  
376  
377  
378  
379  
380

**Figure 4. SBS4 activity associated with sex but not smoking status in lung adenocarcinoma.** (A) SBS4 activity was predominantly observed in lung cancers including lung adenocarcinoma (LUAD), lung squamous cell carcinoma (LUSC), and small cell lung cancer (SCLC). Each stacked bar represents the estimated activity levels of each signature in each tumor. Signatures with no estimated activity in these tumor types were excluded. (B) The relationship between smoking status, sex, and *EGFR* mutation status is shown for a subset of LUADs with complete clinical information (n=271). A higher proportion of males were observed in smokers compared to non-smokers and a higher proportion of *EGFR* mutations were observed in females compared to males in both smokers and non-smokers. (C) Using a Wilcoxon rank-sum test, SBS4 activity was significantly higher in males compared to females in both smokers and non-smokers but was not significantly different between smokers and non-smokers within males or within females. (D) Using a multivariate linear model, SBS4 activity was associated with sex, sample type (i.e. lower in metastasis compared to primary), *EGFR* mutation status, and age.



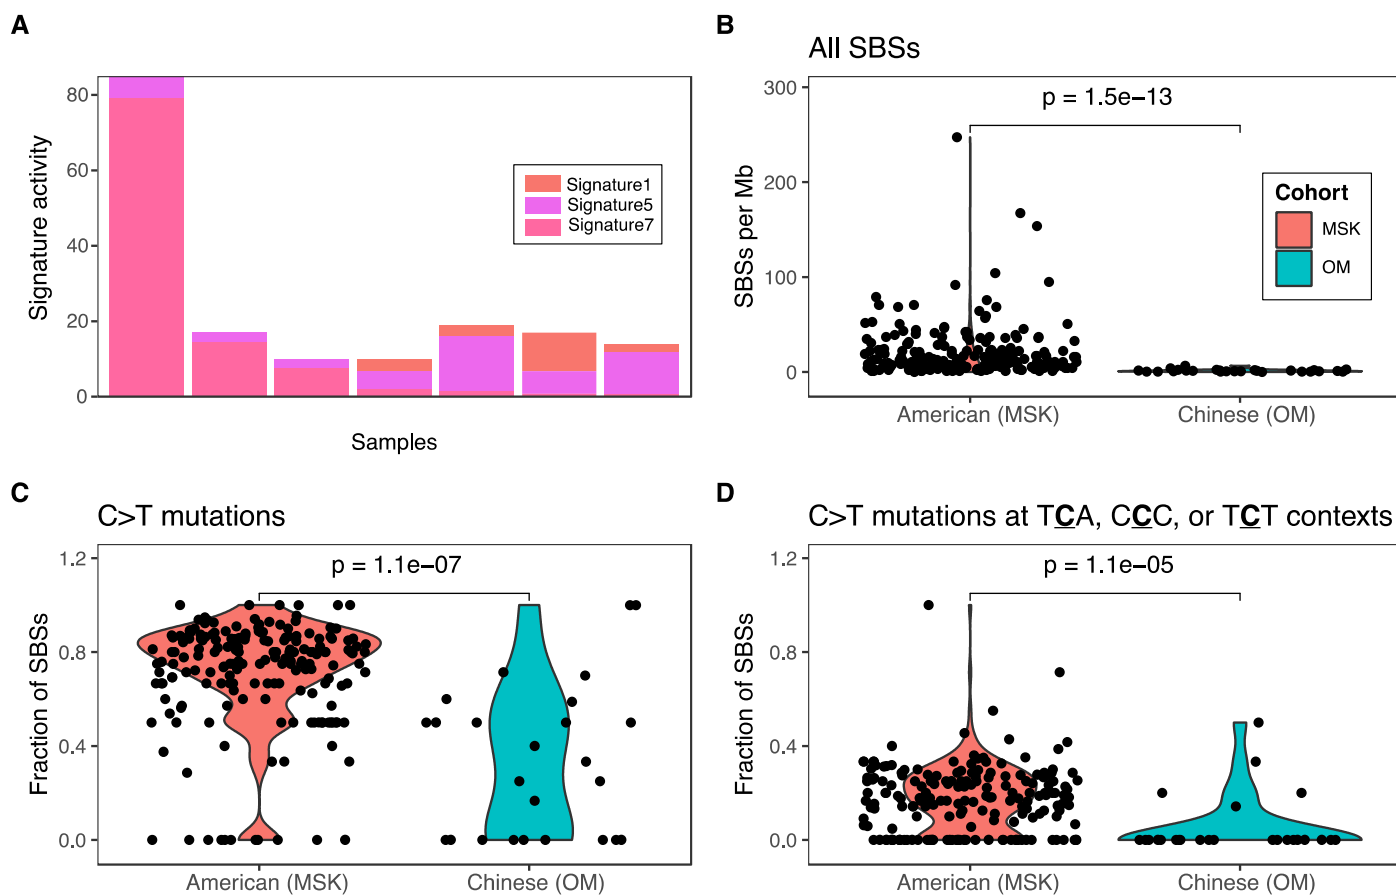

**Figure 5. Decrease in UV-associated mutations in cutaneous melanomas from Chinese patients. (A)** Barplot of signature activities for 7 melanomas in the OM cohort. **(B)** The total number of SBS mutations per megabase (Mb), **(C)** the fraction of C>T mutations, and **(D)** the fraction of C>T mutations at the TCA, CCC, or TCT trinucleotide contexts were significantly lower in cutaneous melanomas from the Chinese cohort compared to cutaneous melanomas from the American cohort.

382  
383  
384  
385  
386  
387  
388  
389  
390  
391  
392  
393

## Supplementary Figures

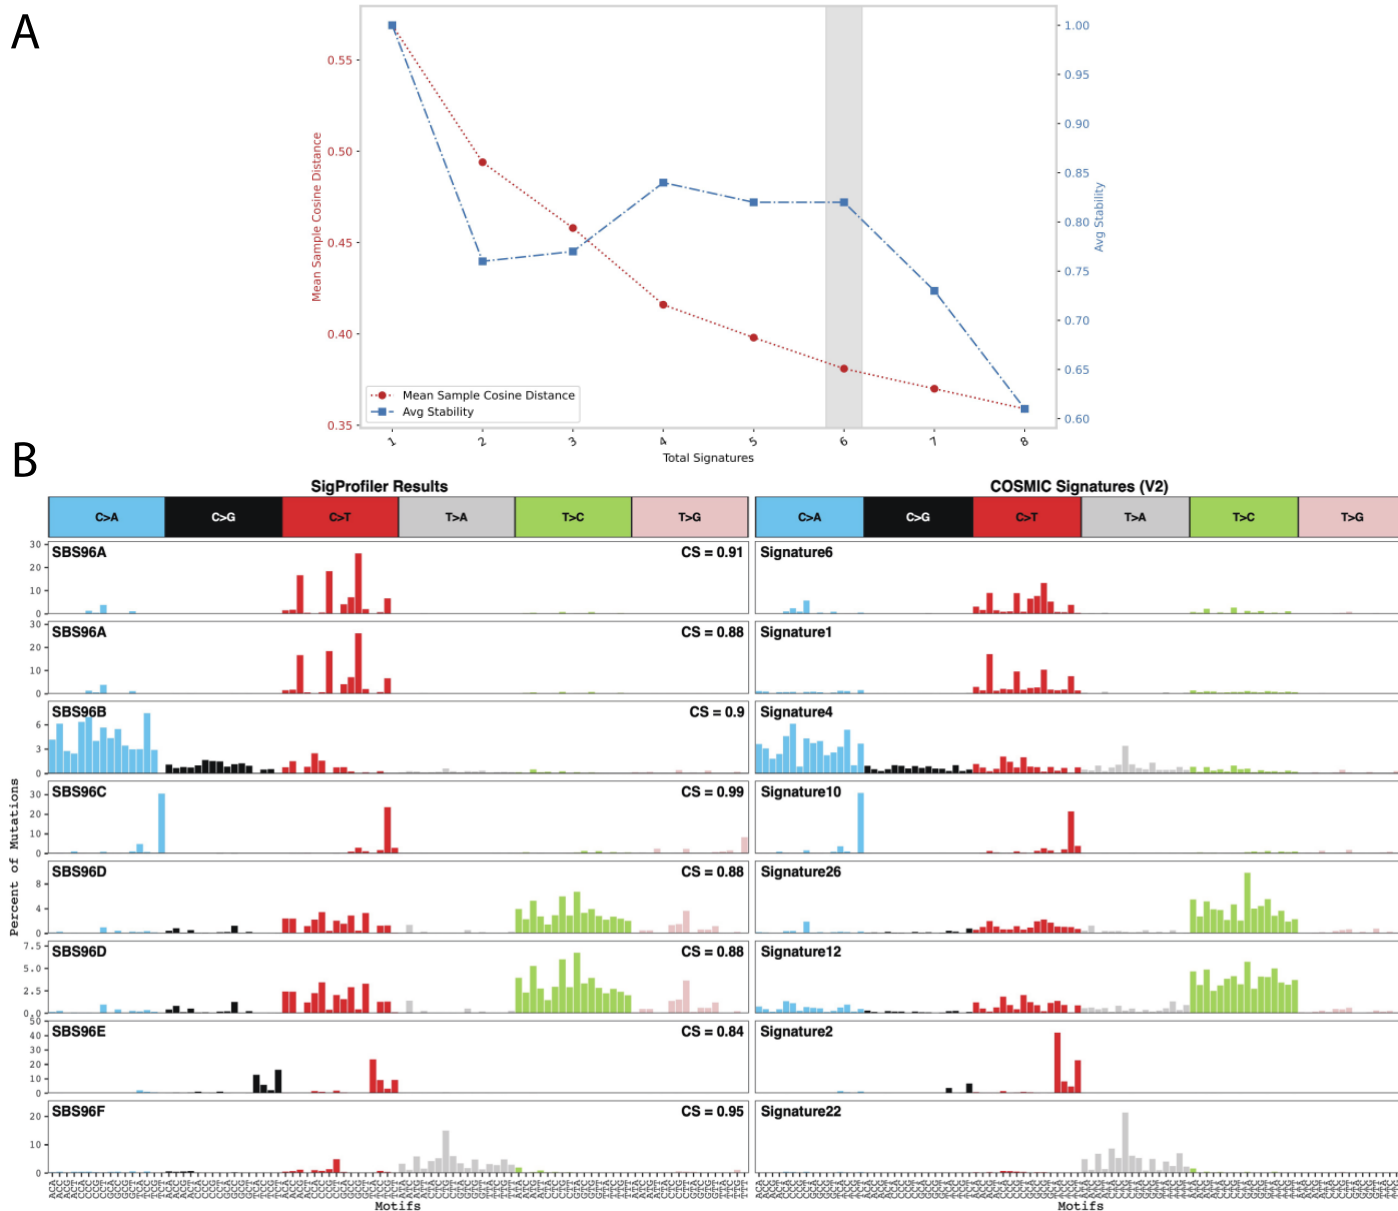

**Supplementary Figure 1. Discovery of mutational signatures *de novo* using NMF. (A)** NMF in the SigProfiler package was run to identify mutational signatures. The optimal number of signatures was determined to be six based on the maximal difference between the mean sample cosine distance and average stability metrics. **(B)** All discovered signatures were highly correlated with at least one known signature in the COSMIC database showing that no new highly active signatures could be identified in this cohort.

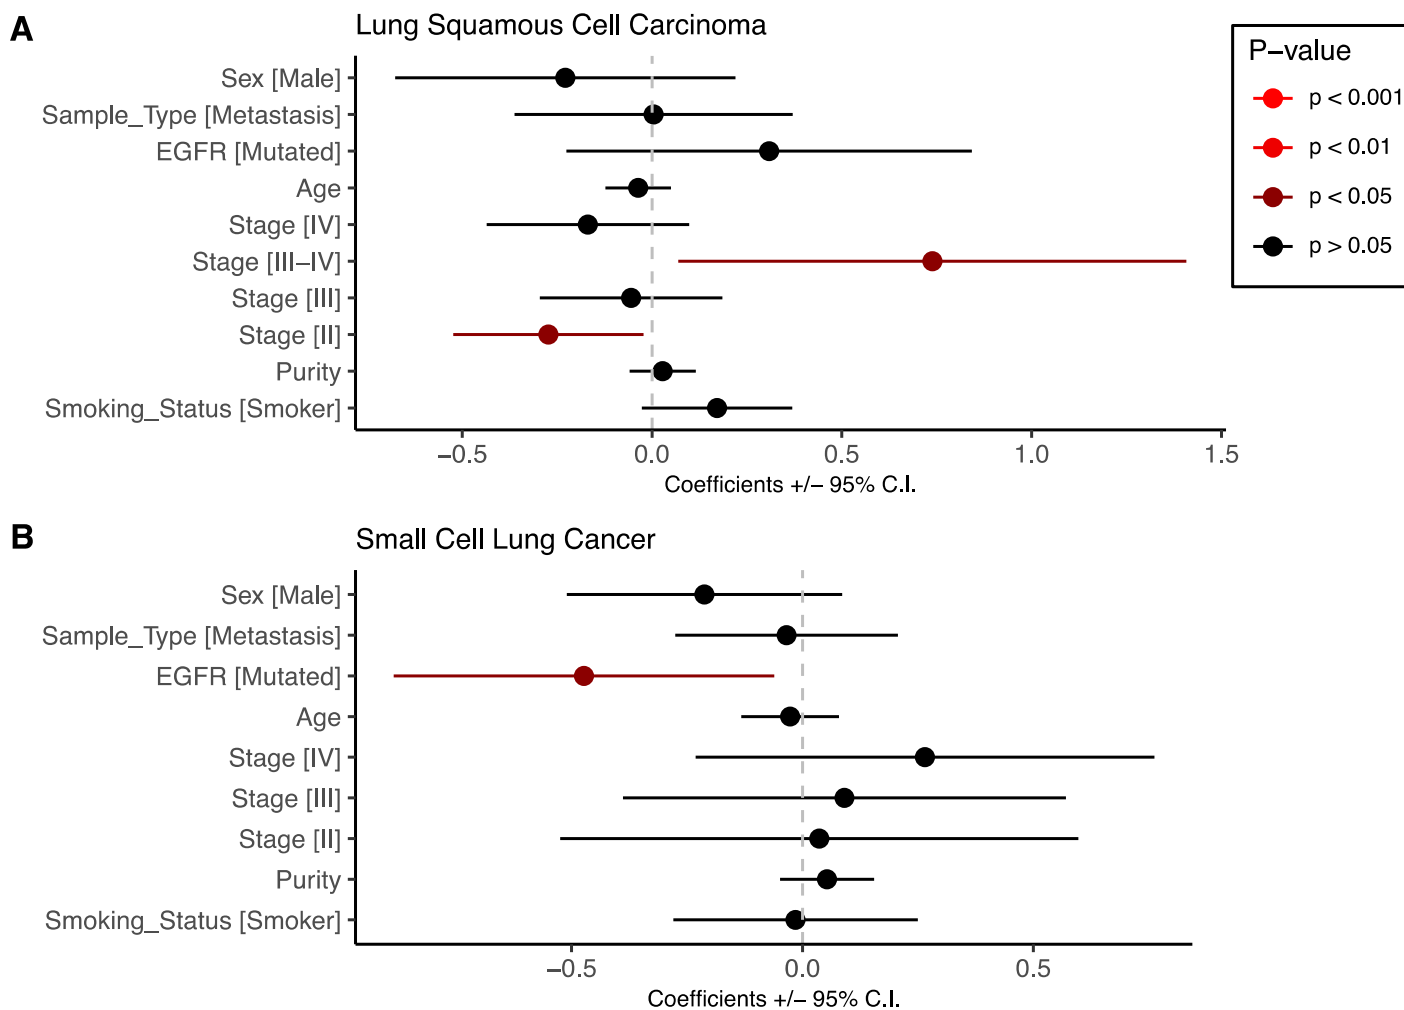

404

405

406

407

408

409

410

**Supplementary Figure 2. Lack of associations between clinical variables and SBS4 activity in lung squamous cell carcinoma (LUSC) and small cell lung cancer (SCLC).** A multivariate linear model was used to assess the relationship between SBS4 activity and clinical variables in **(A)** lung squamous cell carcinoma and **(B)** small cell lung cancer. Only moderate associations were observed between SBS4 activity and Stage II or Stage III-IV tumors in LUSC or *EGFR* mutations in SCLC ( $p < 0.05$ ). No associations were observed between smoking status and sex ( $p > 0.05$ ).
